# Supplementary material for: Comparison of Bacterial Community Composition in Gut of Chinese Mitten Crabs from Three Distinct Rivers in Korea
Source: MDPI journal article supplement (doi:10.3390/fishes9040144), 2024-04-20
Supplement: s1 [file s1]

**Table S1. General biological indicators for each crab sample.**

| S. No. | Sample ID | Weight<br>(g) | Carapace width<br>(cm) | Carapace length<br>(cm) | Sample site       |
|--------|-----------|---------------|------------------------|-------------------------|-------------------|
| 1      | GD1       | 176.08        | 70.95                  | 67.1                    | Geum river (GD)   |
| 2      | GD2       | 126.8         | 63.7                   | 59                      |                   |
| 3      | GD3       | 142.21        | 67.3                   | 62.2                    |                   |
| 4      | GD4       | 93.47         | 59.1                   | 55.5                    |                   |
| 5      | GD5       | 131.27        | 63.95                  | 60.2                    |                   |
| 6      | GD6       | 83.76         | 59.95                  | 51.95                   |                   |
| 7      | GD7       | 71.15         | 52.85                  | 50.25                   |                   |
| 8      | GD8       | 134.12        | 65.85                  | 60.7                    |                   |
| 9      | GD9       | 115.75        | 61.5                   | 56.9                    |                   |
| 10     | GD10      | 152.93        | 67.8                   | 63.35                   |                   |
| 11     | GD11      | 156.2         | 66.3                   | 61.7                    |                   |
| 12     | GD12      | 150.37        | 67                     | 63.1                    |                   |
| 13     | GD13      | 161.73        | 68.05                  | 63.7                    |                   |
| 14     | GD14      | 111.54        | 62.35                  | 56.9                    |                   |
| 15     | GD15      | 150.66        | 68.8                   | 64.95                   |                   |
| 16     | GD16      | 105.52        | 60.75                  | 55.6                    |                   |
| 17     | GD17      | 120.89        | 61.45                  | 56.8                    |                   |
| 18     | GD18      | 162.75        | 70.2                   | 63.95                   |                   |
| 19     | HD1       | 58.27         | 51.2                   | 47.15                   | Han river (HD)    |
| 20     | HD2       | 61.74         | 53.2                   | 49.1                    |                   |
| 21     | HD3       | 55.95         | 50.9                   | 46.7                    |                   |
| 22     | HD4       | 57.23         | 51.45                  | 47.2                    |                   |
| 23     | HD5       | 50.37         | 49.25                  | 44.75                   |                   |
| 24     | HD6       | 54.41         | 50.35                  | 46.45                   |                   |
| 25     | HD7       | 59.35         | 48.75                  | 46                      |                   |
| 26     | HD8       | 61.26         | 50.55                  | 46.65                   |                   |
| 27     | HD9       | 54.21         | 49.3                   | 44.95                   |                   |
| 28     | HD10      | 86.87         | 58.5                   | 52.2                    |                   |
| 29     | HD11      | 52.25         | 49.25                  | 44.7                    |                   |
| 30     | HD12      | 51.75         | 48.8                   | 45.4                    |                   |
| 31     | HD13      | 59.35         | 52.2                   | 47.8                    |                   |
| 32     | HD14      | 58.3          | 50.35                  | 46.65                   |                   |
| 33     | HD15      | 63.93         | 53.75                  | 48.6                    |                   |
| 34     | HD16      | 79.97         | 57.4                   | 52.55                   |                   |
| 35     | HD17      | 63.83         | 53.3                   | 50.2                    |                   |
| 36     | HD18      | 64.15         | 53.25                  | 48.65                   |                   |
| 37     | TD1       | 49.58         | 47.7                   | 42.85                   | Tamjin river (TD) |
| 38     | TD2       | 50.31         | 48.1                   | 44                      |                   |
| 39     | TD3       | 48.76         | 47                     | 42.95                   |                   |
| 40     | TD4       | 38.44         | 43                     | 40                      |                   |
| 41     | TD5       | 37.55         | 40.55                  | 46.55                   |                   |
| 42     | TD6       | 33.56         | 41.1                   | 37.9                    |                   |
| 43     | TD7       | 49.28         | 48.85                  | 41.8                    |                   |
| 44     | TD8       | 32.94         | 41.85                  | 37.9                    |                   |

|    |      |       |       |       |
|----|------|-------|-------|-------|
| 45 | TD9  | 35.15 | 41.95 | 38.1  |
| 46 | TD10 | 77.97 | 56.5  | 52.9  |
| 47 | TD11 | 53.81 | 52.8  | 49.85 |
| 48 | TD12 | 65.08 | 58.9  | 48.6  |
| 49 | TD13 | 50.88 | 47.9  | 45.25 |
| 50 | TD14 | 50.92 | 48.9  | 45.55 |
| 51 | TD15 | 44.98 | 47.05 | 44.25 |
| 52 | TD16 | 43.67 | 46.45 | 43.3  |
| 53 | TD17 | 39.83 | 44.45 | 41.75 |
| 54 | TD18 | 41.79 | 45.65 | 42.15 |

---

**Table S2: Summary of environmental parameters for each sampling site.**

| Site | River        | Latitude     | Longitude     | Temperature<br>(°C) | pH   | CDS<br>(mS) | DO<br>(mg/L) | Salt<br>(ppm) | Date       |
|------|--------------|--------------|---------------|---------------------|------|-------------|--------------|---------------|------------|
| HD   | Han river    | 37°34'28.4"N | 126°51'36.7"E | 16.3°C              | 7.18 | 0.268       | 21.6         | 146           | 10/21/2021 |
| GD   | Geum river   | 36°04'50.8"N | 126°37'48.7"E | 17.3°C              | 9.73 | 9.57        | 10.2         | 0.0           | 11/1/2021  |
| SD   | Tamjin river | 34°58'00.4"N | 127°35'16.1"E | 19.2°C              | 7.00 | 0.456       | 12.7         | 233           | 11/3/2021  |

**Table S3:** Gradient elution of HPLC in determination of free amino acids.

| <b>Min.</b> | <b>A%</b> | <b>B%</b> |
|-------------|-----------|-----------|
| 0.0         | 88.0      | 12.0      |
| 8.0         | 88.0      | 12.0      |
| 12.0        | 84.0      | 16.0      |
| 20.0        | 70.0      | 30.0      |
| 20.5        | 65.0      | 35.0      |
| 25.0        | 55.0      | 45.0      |
| 40.0        | 49.0      | 51.0      |
| 45.0        | 0.0       | 100.0     |
| 62.0        | 0.0       | 100.0     |
| 62.1        | 88.0      | 12.0      |
| 70.0        | 88.0      | 12.0      |

**Table S4: Summary of alpha-diversity metrics at three sampling sites.**

| Sample | Chao1 | Shannon | Evenness |
|--------|-------|---------|----------|
| HD     | 570   | 4.14    | 0.653    |
| SD     | 566   | 4.70    | 0.742    |
| GD     | 305   | 4.01    | 0.70     |
